# Supplementary material for: Enhancing photoactivity of defective g-C3N4via self-polarization effect of tourmaline for CO2 reduction
Source: Royal Society of Chemistry journal article supplement (doi:10.1039/d4ta06709f), 2024-11-18
Supplement: d4ta06709f1.pdf [file d4ta06709f1.pdf]

## Supporting Information

### Enhancing photoactivity of defective g-C<sub>3</sub>N<sub>4</sub> via self-polarization effect of tourmaline for CO<sub>2</sub> reduction †

Jiangpeng Wang, Chao Huang, Deng Liu, HuiHui Peng, Qiong Luo, Dimin Yang, Xuelian Yu\*,  
Yingmo Hu\*

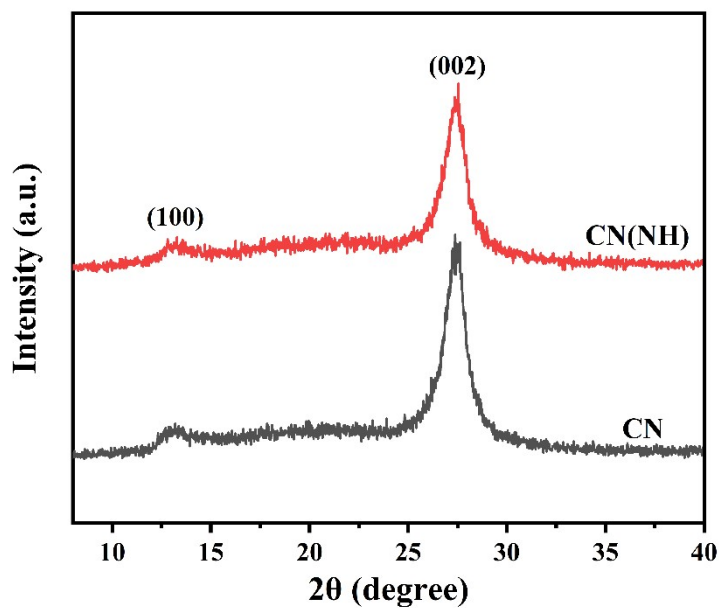

Figure S1. XRD patterns of CN and CN(NH).

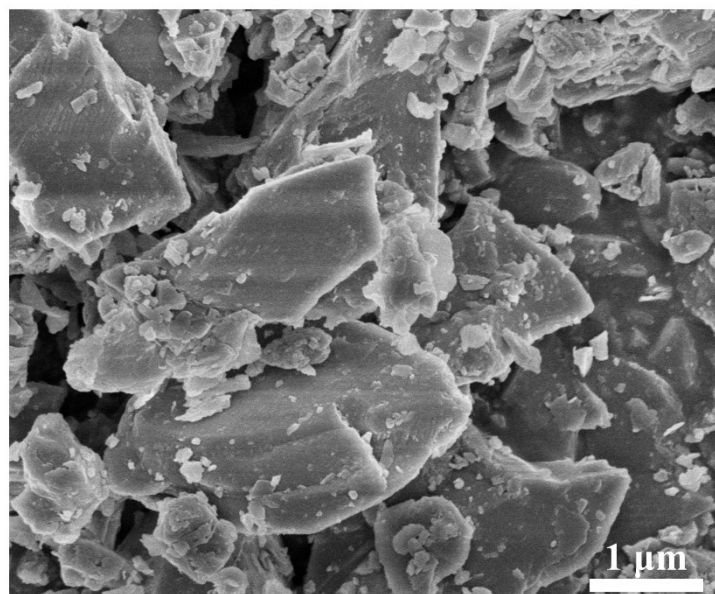

Figure S2. SEM image of TM.

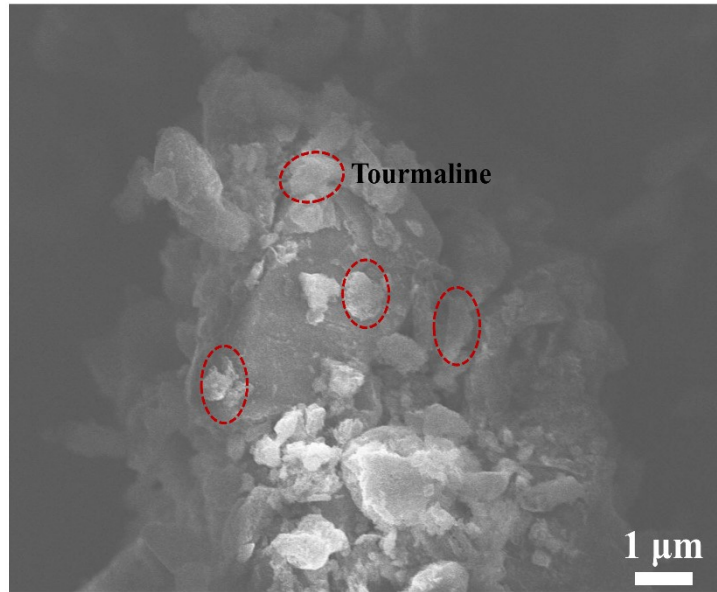

**Figure S3.** SEM image of 25TM/CN(NH).

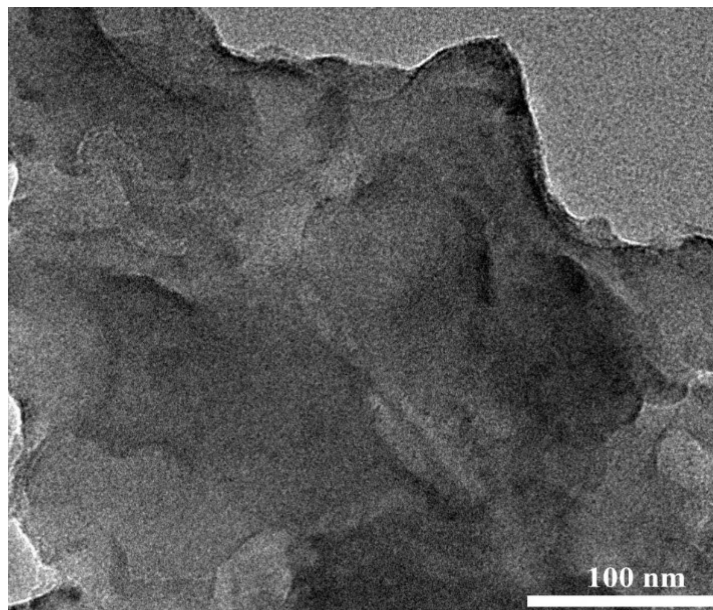

**Figure S4.** TEM image of CN.

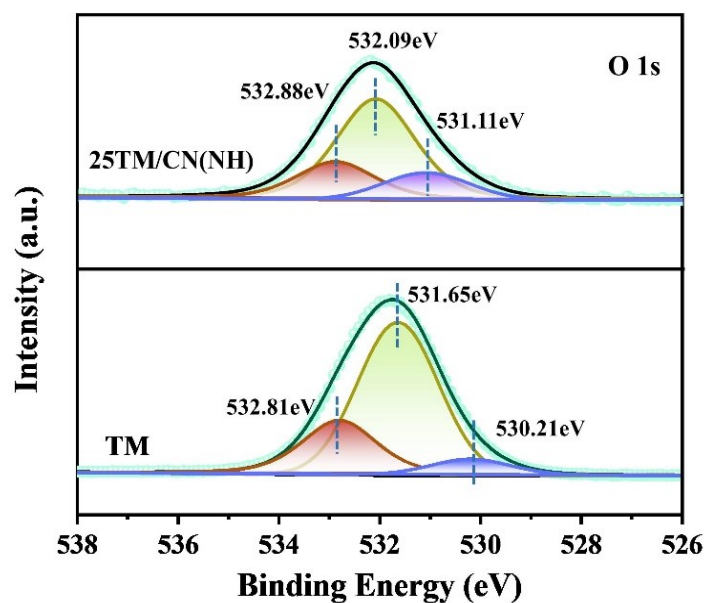

Figure S5. XPS spectra of TM and 25TM/CN(NH): O 1s.

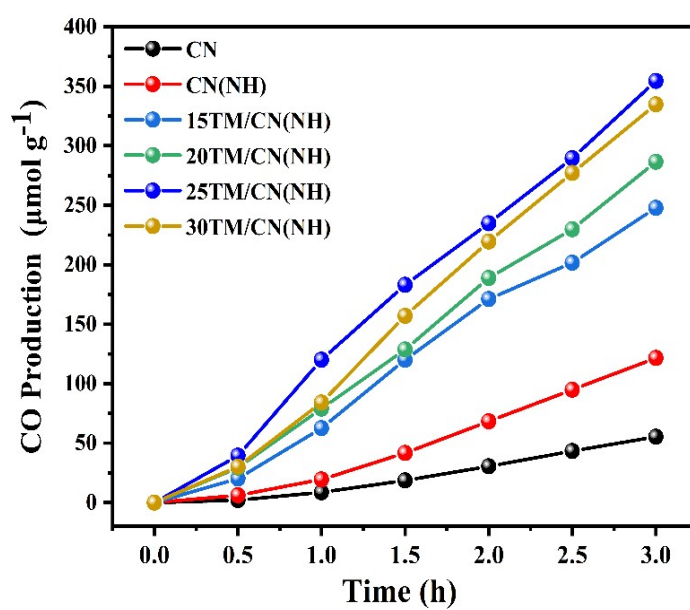

Figure S6. Time-dependent CO yields produced in the presence of different photocatalysts.

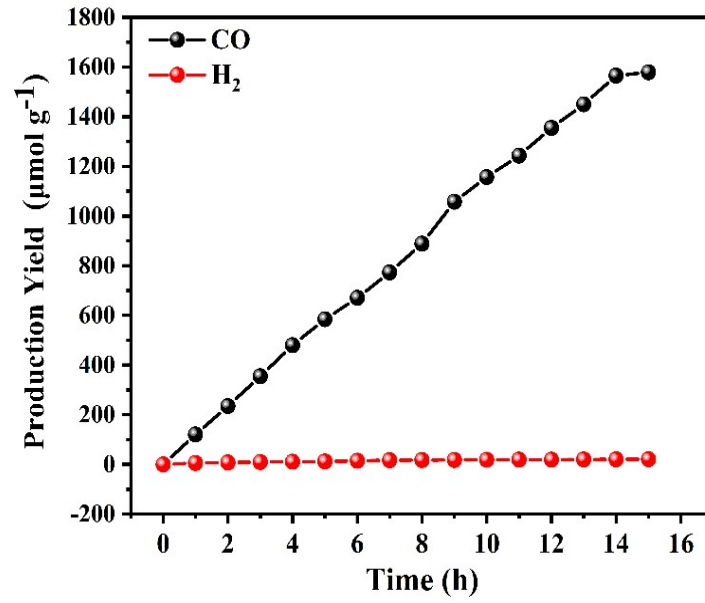

Figure S7. The plot of CO and H<sub>2</sub> yields of 25TM/CN(NH) over a continuous 15 h period.

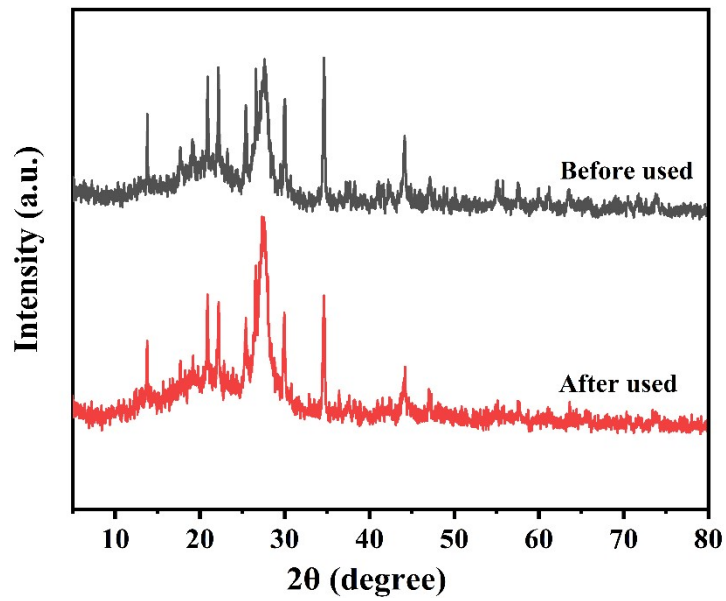

Figure S8. XRD patterns of 25TM/CN(NH) before and after the cyclic experiment.

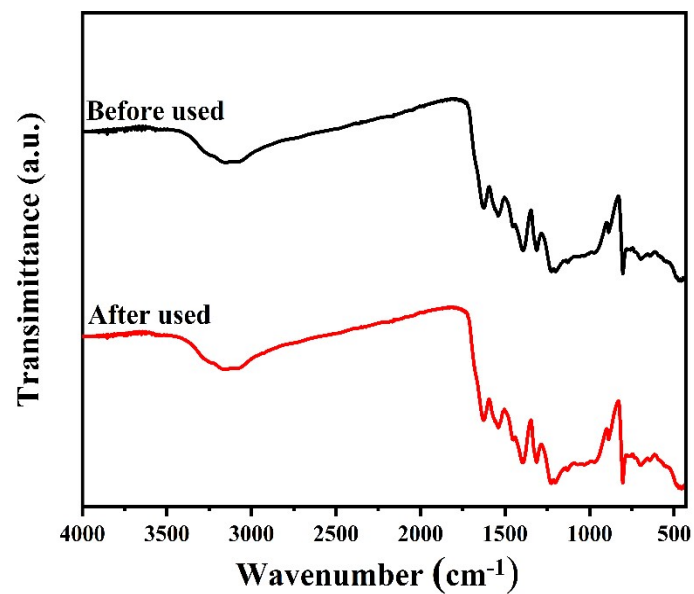

Figure S9. FTIR spectra of 25TM/CN(NH) before and after the cyclic experiment.

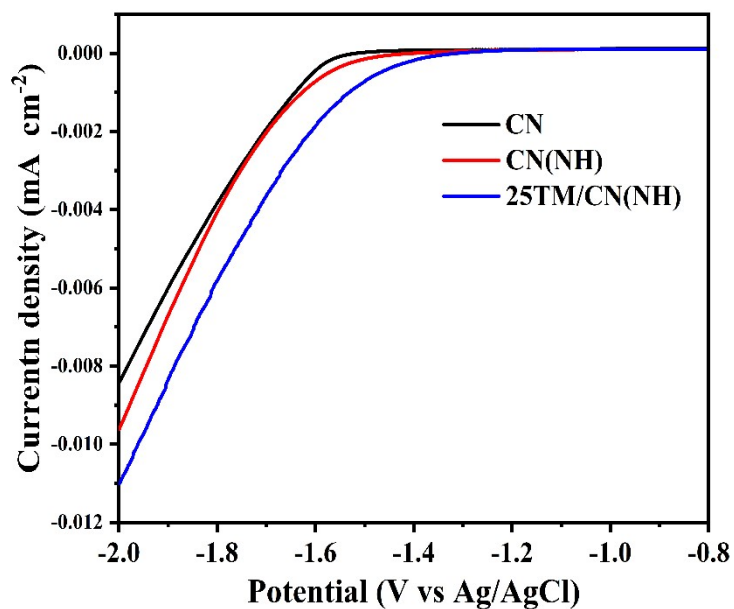

Figure S10. Polarization curve of CN, CN (NH), and 25TM/CN (NH).

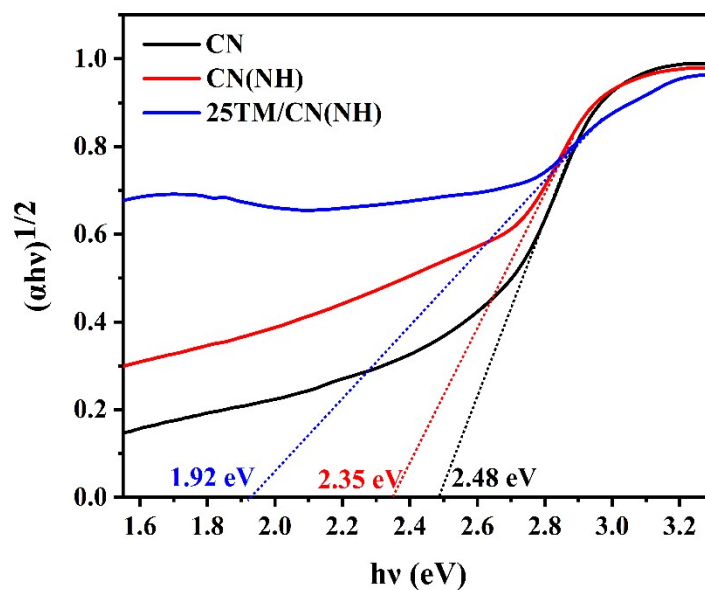

**Figure S11.** Tauc spectra of CN, CN(NH), and 25TM/CN(NH).

**Table S1:** Photocatalytic CO<sub>2</sub> reduction properties of previously reported g-C<sub>3</sub>N<sub>4</sub> based photocatalysts

| Catalysts                                                              | Reaction condition  | Sacrificial agent | Light source        | CO production rate (μmol g <sup>-1</sup> h <sup>-1</sup> ) | CO Selectivity | Ref.             |
|------------------------------------------------------------------------|---------------------|-------------------|---------------------|------------------------------------------------------------|----------------|------------------|
| Cu <sub>2</sub> ZnSnS <sub>4</sub> /Pt/g-C <sub>3</sub> N <sub>4</sub> | gas-solid, water    | /                 | 400W Xe lamp        | 34.7                                                       | 68.55%         | 1                |
| NiO/g-C <sub>3</sub> N <sub>4</sub>                                    | Liquid-solid        | TEOA              | a 300 W Xe lamp     | 3.78                                                       | 68.4%          | 2                |
| g-C <sub>3</sub> N <sub>4</sub> /In <sub>2</sub> O <sub>3</sub>        | Liquid-solid        | TEOA              | 300 W Xe lamp       | 274                                                        | 100%           | 3                |
| Co <sub>4</sub> @g-C <sub>3</sub> N <sub>4</sub>                       | Liquid-solid        | TEOA              | 300 W Xe lamp       | 107                                                        | 94%            | 4                |
| CN/CTF                                                                 | Liquid-solid        | TEOA              | 300 W Xe lamp       | 151                                                        | /              | 5                |
| BCN-30                                                                 | Liquid-solid        | TEOA              | 300 W Xe lamp       | 93                                                         | /              | 6                |
| Bi-BCN-0.2                                                             | Liquid-solid        | /                 | 300 W Xe lamp       | 16.31                                                      | 88.67%         | 7                |
| <b>25TM/CN(NH)</b>                                                     | <b>Liquid-solid</b> | <b>TEOA</b>       | <b>300W Xe lamp</b> | <b>118.17</b>                                              | <b>95.56%</b>  | <b>This work</b> |

- 
- 1 A. Raza, H. Shen and A. A. Haidry, *Appl. Catal., B*, 2020, **277**, 119239.
  - 2 F. Tao, Y. Dong and L. Yang, *Appl. Surf. Sci.*, 2023, **638**, 158044.
  - 3 L. Wang, Y. Chen, C. Zhang, Z. Zhong and L. Amirav, *ACS Appl. Mater. Inter.*, 2024, **16**, 4581-4591.
  - 4 J. Zhou, W. Chen, C. Sun, L. Han, C. Qin, M. Chen, X. Wang, E. Wang and Z. Su, *ACS Appl. Mater. Inter.*, 2017, **9**, 11689-11695.
  - 5 J. He, X. Wang, S. Jin, Z.-Q. Liu and M. Zhu, *Chinese J. Catal.*, 2022, **43**, 1306-1315.
  - 6 C. Huang, C. Chen, M. Zhang, L. Lin, X. Ye, S. Lin, M. Antonietti and X. Wang, *Nat. Commun.*, 2015, **6**, 7698.
  - 7 W. Tang, H. Ye, Y. Xie, P. Chen, L. Luo and Y. Zhang, *Chem. Eng. J.*, 2023, **478**, 147350.
